# Supplementary material for: Up-regulation of Insulin-like Growth Factor Binding Protein-3 Is Associated with Brain Metastasis in Lung Adenocarcinoma
Source: PubMed Central journal article supplement — Mol Cells. 2019 Mar 13;42(4):321–32. doi: 10.14348/molcells.2019.2441 (PMC6530643; doi:10.14348/molcells.2019.2441), 2019-03-13
Supplement: KSMCB-42-321_Suppl_Fig.pdf [file KSMCB-42-321_Suppl_Fig.pdf]

## Up-regulation of Insulin-like Growth Factor Binding Protein-3 Is Associated with Brain Metastasis in Lung Adenocarcinoma

Lishi Yang<sup>1,3</sup>, Junyang Li<sup>1,3</sup>, Shaozhi Fu<sup>1</sup>, Peirong Ren<sup>1</sup>, Juan Tang<sup>1</sup>, Na Wang<sup>1</sup>, Xiangxiang Shi<sup>1</sup>, Jingbo Wu<sup>1</sup>, and Sheng Lin<sup>1,2,\*</sup>

<sup>1</sup>Department of Oncology, <sup>2</sup>Nuclear Medicine and Molecular Imaging Key Laboratory of Sichuan Province, Affiliated Hospital of Southwest Medical University, Luzhou 646000, China

\*Correspondence: [linsheng@swmu.edu.cn](mailto:linsheng@swmu.edu.cn)

<sup>3</sup>These authors contributed equally to this work.

### Supplementary Data

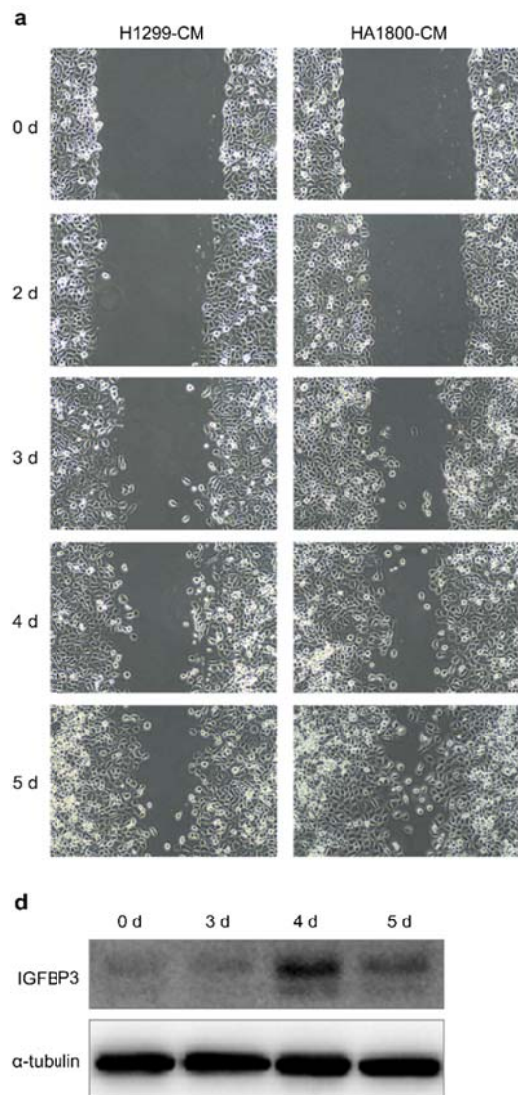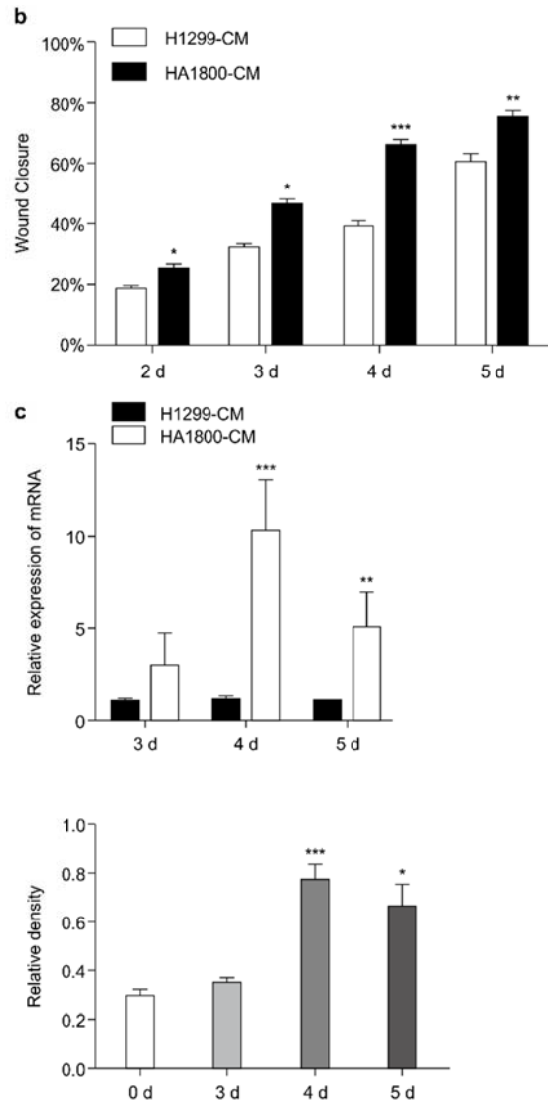

Fig. S1. HA1800-CM up-regulated IGFBP3 expression in H1299 cells. (a) Wound healing of H1299 cells treated with H1299-CM and HA1800-CM at different time points. (b) Wound closure of H1299 cells treated with H1299-CM and HA1800-CM at different time points. (c) IGFBP3 mRNA expression was evaluated by qRT-PCR analysis. (d) IGFBP3 protein expression was detected by western blotting, and  $\alpha$ -tubulin was used as the reference protein (left). The histograms represent the protein expression levels quantified by densitometry and normalized to  $\alpha$ -tubulin (right). Data are presented as the mean  $\pm$  S.E.M. (\* $p$  < 0.05, \*\* $p$  < 0.01, \*\*\* $p$  < 0.001)
